# Supplementary material
Source: PubMed Central journal article supplement (PMC4915074)
Supplement: NIHMS790055-supplement-SI.pdf [file NIHMS790055-supplement-SI.pdf]

## *Supplemental Information*

# **Identification and optimization of small molecule agonists of the human relaxin hormone receptor RXFP1**

*Jingbo Xiao<sup>1,†</sup>, Zaohua Huang<sup>2,†</sup>, Catherine Z. Chen<sup>1</sup>, Irina U. Agoulnik<sup>3</sup>, Noel Southall<sup>1</sup>, Xin Hu<sup>1</sup>, Raisa E.*

*Jones<sup>1</sup>, Marc Ferrer<sup>1</sup>, Wei Zheng<sup>1</sup>, Alexander I. Agoulnik<sup>2,\*</sup>, and Juan J. Marugan<sup>1,\*</sup>*

<sup>1</sup>NIH Chemical Genomics Center, Division of Pre-Clinical Innovation, National Center for Advancing Translational Sciences, National Institutes of Health, 9800 Medical Center Drive, Rockville, Maryland 20850, USA.

<sup>2</sup>Department of Human and Molecular Genetics, <sup>3</sup>Department of Cellular Biology and Pharmacology, Herbert Wertheim College of Medicine, Florida International University, 11200 SW 8th Street, Miami, Florida 33199, USA.

† These authors contributed equally to this project.

\* To whom correspondence should be addressed: e-mail: maruganj@mail.nih.gov (J.J.M.); aagoulni@fiu.edu (A.I.A.).

## Methods

### General Methods for Chemistry.

All air or moisture sensitive reactions were performed under positive pressure of nitrogen with oven-dried glassware. Anhydrous solvents such as dichloromethane, *N,N*-dimethylformamide (DMF), acetonitrile, methanol and triethylamine were purchased from Sigma-Aldrich (St. Louis, MO). Preparative purification was performed on a Waters semi-preparative HPLC system (Waters Corp., Milford, MA). The column used was a Phenomenex Luna C<sub>18</sub> (5 micron, 30 x 75 mm; Phenomenex, Inc., Torrance, CA) at a flow rate of 45.0 mL/min. The mobile phase consisted of acetonitrile and water (each containing 0.1% trifluoroacetic acid). A gradient of 10% to 50% acetonitrile over 8 minutes was used during the purification. Fraction collection was triggered by UV detection at 220 nm. Analytical analysis was performed on an Agilent LC/MS (Agilent Technologies, Santa Clara, CA). Method 1: A 7-minute gradient of 4% to 100% acetonitrile (containing 0.025% trifluoroacetic acid) in water (containing 0.05% trifluoroacetic acid) was used with an 8-minute run time at a flow rate of 1.0 mL/min. Method 2: A 3-minute gradient of 4% to 100% acetonitrile (containing 0.025% trifluoroacetic acid) in water (containing 0.05% trifluoroacetic acid) was used with a 4.5-minute run time at a flow rate of 1.0 mL/min. A Phenomenex Luna C<sub>18</sub> column (3 micron, 3 x 75 mm) was used at a temperature of 50 °C. Purity determination was performed using an Agilent diode array detector for both Method 1 and Method 2. Mass determination was performed using an Agilent 6130 mass spectrometer with electrospray ionization in the positive mode. <sup>1</sup>H NMR spectra were recorded on Varian 400 MHz spectrometers (Agilent Technologies, Santa Clara, CA). Chemical shifts are reported in ppm with undeuterated solvent (DMSO-*d*<sub>6</sub> at 2.49 ppm) as internal standard for DMSO-*d*<sub>6</sub> solutions. All of the analogs tested in the biological assays have a purity of greater than 95% based on both analytical methods. High resolution mass spectrometry was recorded on Agilent 6210 Time-of-Flight (TOF) LC/MS system. Confirmation of molecular formula was accomplished using electrospray ionization in the positive mode with the Agilent Masshunter software (Version B.02).

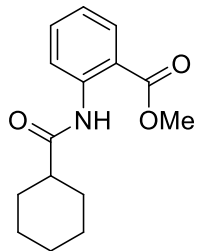

**Methyl 2-(cyclohexanecarboxamido)benzoate.** A solution of methyl 2-aminobenzoate (3.00 g, 19.9 mmol) in dichloromethane (100 mL) and triethylamine (8.30 mL, 59.5 mmol) was treated at 0 °C with cyclohexanecarbonyl chloride (2.70 mL, 19.9 mmol). The reaction was stirred at 0 °C for 2 h and room temperature for additional 2 h. The reaction mixture was concentrated and purified via silica gel chromatography using a gradient of 0-40% of EtOAc in hexanes to give 5.00 g (96%) of the title product as a white solid.

LC-MS Retention Time:  $t_1$  (Method 1) = 6.453 min.

$^1\text{H}$  NMR (400 MHz, DMSO- $d_6$ )  $\delta$  ppm 10.65 (s, 1 H), 8.31 (dd,  $J=8.5$ , 1.1 Hz, 1 H), 7.90 (dd,  $J=7.9$ , 1.7 Hz, 1 H), 7.57 (ddd,  $J=8.6$ , 7.2, 1.7 Hz, 1 H), 6.87 - 7.29 (m, 1 H), 3.83 (s, 3 H), 2.31 (tt,  $J=11.3$ , 3.5 Hz, 1 H), 1.88 (dd,  $J=12.9$ , 2.5 Hz, 2 H), 1.73 (ddd,  $J=12.4$ , 3.3, 3.1 Hz, 2 H), 1.55 - 1.67 (m, 1 H), 1.08 - 1.47 (m, 5 H).

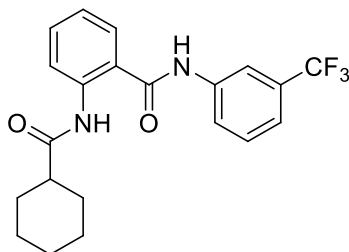

**2-(Cyclohexanecarboxamido)-N-(3-(trifluoromethyl)phenyl)benzamide (1).** A solution of methyl 2-(cyclohexanecarboxamido)benzoate (150 mg, 0.574 mmol) in toluene (6.00 mL) was treated at room temperature with 3-(trifluoromethyl)aniline (0.143 mL, 1.15 mmol) followed by trimethylaluminum (0.574 mL, 2.0 M in hexanes, 1.15 mmol). The reaction mixture was stirred at 100 °C overnight. After cooling, the reaction mixture was quenched with 100  $\mu\text{L}$  of water and concentrated *in vacuo*. The crude residue was purified via silica gel chromatography using a gradient of 0-60% of EtOAc in hexanes to give 158 mg (71%) of the title compound as a white solid.

LC-MS Retention Time:  $t_1$  (Method 1) = 6.910 min.

$^1\text{H}$  NMR (400 MHz,  $\text{DMSO-}d_6$ )  $\delta$  ppm 10.62 (s, 1 H), 10.30 (s, 1 H), 8.13 (s, 1 H), 8.09 (dd,  $J=8.2, 0.8$  Hz, 1 H), 7.96 (d,  $J=8.2$  Hz, 1 H), 7.75 (dd,  $J=7.8, 1.6$  Hz, 1 H), 7.59 (t,  $J=8.0$  Hz, 1 H), 7.51 (td,  $J=7.8, 1.6$  Hz, 1 H), 7.45 (dd,  $J=7.8, 0.8$  Hz, 1 H), 7.22 (td,  $J=7.6, 1.2$  Hz, 1 H), 2.28 (tt,  $J=11.2, 3.5$  Hz, 1 H), 1.80 (dd,  $J=12.7, 2.2$  Hz, 2 H), 1.68 (ddd,  $J=12.3, 3.1, 2.9$  Hz, 2 H), 1.52 - 1.63 (m, 1 H), 1.04 - 1.42 (m, 5 H).

$^{13}\text{C}$  NMR (101 MHz,  $\text{DMSO-}d_6$ )  $\delta$  ppm 173.94, 167.20, 139.67, 137.76, 131.75, 129.83, 129.30 (q,  $J = 32.3$  Hz), 128.74, 124.57 (s), 124.12 (q,  $J = 273$  Hz), 124.07 (s), 123.15 (s), 122.01 (s), 120.11 (q,  $J = 3.7$  Hz), 116.67 (q,  $J = 4.0$  Hz), 45.02, 28.99, 25.36, 25.04.

$^{19}\text{F}$  NMR (376 MHz,  $\text{DMSO-}d_6$ )  $\delta$  ppm -61.30 (s, 3 F).

HRMS (ESI)  $m/z$  ( $\text{M}+\text{H}$ ) $^+$  calcd. for  $\text{C}_{21}\text{H}_{22}\text{F}_3\text{N}_2\text{O}_2$ , 391.1628; found 391.1632.

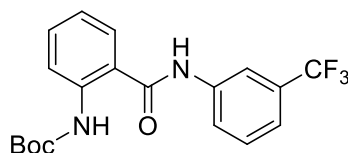

**tert-Butyl 2-(3-(trifluoromethyl)phenylcarbamoyl)phenylcarbamate.** A solution of 2-(*tert*-butoxycarbonylamino)benzoic acid (3.00 g, 12.6 mmol) and 3-(trifluoromethyl)aniline (2.36 mL, 19.0 mmol) in dichloromethane (75.0 mL) was treated at room temperature with DMAP (1.55 g, 12.6 mmol) and EDC (4.85 g, 25.3 mmol) and stirred at room temperature for 24 h. The reaction mixture was concentrated and purified via silica gel chromatography using a gradient of 0-100% of dichloromethane in hexanes followed by 10% of EtOAc in dichloromethane to give 2.20 g (46%) of the title product as a white solid.

LC-MS Retention Time:  $t_1$  (Method 1) = 7.042 min.

$^1\text{H}$  NMR (400 MHz,  $\text{DMSO-}d_6$ )  $\delta$  ppm 10.64 (s, 1 H), 9.75 (s, 1 H), 8.14 (s, 1 H), 7.98 (d,  $J=7.6$  Hz, 1 H), 7.94 (d,  $J=9.2$  Hz, 1 H), 7.77 (dd,  $J=7.9, 1.5$  Hz, 1 H), 7.58 (t,  $J=8.0$  Hz, 1 H), 7.51 (ddd,  $J=8.5, 7.2, 1.5$  Hz, 1 H), 7.45 (d,  $J=7.8$  Hz, 1 H), 7.16 (td,  $J=7.6, 1.1$  Hz, 1 H), 1.41 (s, 9 H).

$^{19}\text{F}$  NMR (376 MHz,  $\text{DMSO-}d_6$ )  $\delta$  ppm -61.20 (s, 3 F).

HRMS (ESI)  $m/z$  ( $\text{M}+\text{H}$ ) $^+$  calcd. for  $\text{C}_{19}\text{H}_{20}\text{F}_3\text{N}_2\text{O}_3$ , 381.1421; found 381.1426.

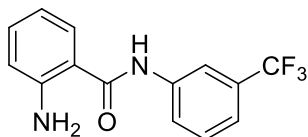

**2-Amino-N-(3-(trifluoromethyl)phenyl)benzamide.** A solution of *tert*-butyl 2-(3-(trifluoromethyl)phenylcarbamoyl)phenylcarbamate (2.11 g, 5.55 mmol) in dichloromethane (15.0 mL) was treated at 0 °C with TFA (5.34 mL, 69.3 mmol). The reaction mixture was stirred at 0 °C for 1 h and room temperature for additional 2 h. The reaction mixture was concentrated and re-dissolved in dichloromethane and washed with saturated Na<sub>2</sub>CO<sub>3</sub> aqueous solution. The organic layer was separated, dried and concentrated to give 1.45 g (99%) of the title compound as a white solid.

LC-MS Retention Time:  $t_1$  (Method 1) = 5.590 min.

<sup>1</sup>H NMR (400 MHz, DMSO-*d*<sub>6</sub>)  $\delta$  ppm 10.24 (s, 1 H), 8.18 (t,  $J=2.2$  Hz, 1 H), 7.95 (ddd,  $J=8.4, 1.2, 1.0$  Hz, 1 H), 7.63 (dd,  $J=8.0, 1.6$  Hz, 1 H), 7.54 (t,  $J=8.3$  Hz, 1 H), 7.34 - 7.43 (m, 1 H), 7.19 (ddd,  $J=8.4, 7.0, 1.6$  Hz, 1 H), 6.74 (dd,  $J=8.3, 1.3$  Hz, 1 H), 6.57 (ddd,  $J=8.1, 7.0, 1.2$  Hz, 1 H), 6.34 (br. s., 2 H).

<sup>19</sup>F NMR (376 MHz, DMSO-*d*<sub>6</sub>)  $\delta$  ppm -61.18 (s, 3 F).

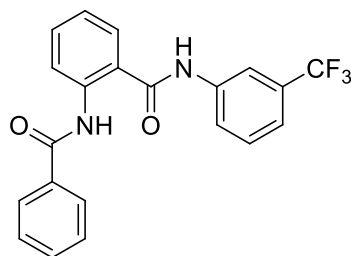

**2-Benzamido-N-(3-(trifluoromethyl)phenyl)benzamide (3).** A solution of 2-amino-*N*-(3-(trifluoromethyl)phenyl)benzamide (50.0 mg, 0.178 mmol) in dichloromethane (2.00 mL) and TEA (0.075 mL, 0.535 mmol) treated at room temperature with benzoyl chloride (0.041 mL, 0.357 mmol). The reaction was stirred at room temperature for 2 h. The mixture was concentrated, re-dissolved in DMSO, filtered and purified via C<sub>18</sub> reverse phase HPLC to give 35.0 mg (51%) of the title compound as a white solid.

LC-MS Retention Time:  $t_1$  (Method 1) = 6.644 min.

$^1\text{H}$  NMR (400 MHz,  $\text{DMSO-}d_6$ )  $\delta$  ppm 11.37 (s, 1 H), 10.78 (s, 1 H), 8.35 (d,  $J=8.2$  Hz, 1 H), 8.11 (s, 1 H), 8.02 (d,  $J=8.2$  Hz, 1 H), 7.84 - 7.96 (m, 3 H), 7.51 - 7.70 (m, 5 H), 7.48 (d,  $J=8.2$  Hz, 1 H), 7.32 (t,  $J=7.4$  Hz, 1 H).

$^{13}\text{C}$  NMR (101 MHz,  $\text{DMSO-}d_6$ )  $\delta$  ppm 167.56, 164.80, 139.48, 138.22, 134.47, 132.26, 131.98, 129.89, 129.33 (q,  $J = 32.3$  Hz), 129.02, 128.79, 127.11, 124.40, 124.08 (q,  $J = 274$  Hz), 123.79, 123.54, 121.93, 120.35 (q,  $J = 3.7$  Hz), 116.96 (q,  $J = 4.0$  Hz).

$^{19}\text{F}$  NMR (376 MHz,  $\text{DMSO-}d_6$ )  $\delta$  ppm -61.28 (s, 3 F).

HRMS (ESI)  $m/z$  ( $\text{M}+\text{H}$ ) $^+$  calcd. for  $\text{C}_{21}\text{H}_{16}\text{F}_3\text{N}_2\text{O}_2$ , 385.1158; found 385.1163.

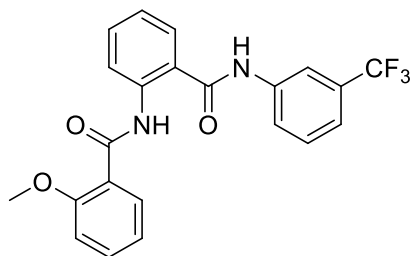

**2-Methoxy-N-(2-((3-(trifluoromethyl)phenyl)carbamoyl)phenyl)benzamide (4).** A solution of 2-amino-*N*-(3-(trifluoromethyl)phenyl)benzamide (50.0 mg, 0.178 mmol) in dichloromethane (2.00 mL) and TEA (0.075 mL, 0.535 mmol) was treated at room temperature with 2-methoxybenzoyl chloride (0.036 mL, 0.268 mmol). The reaction was stirred at room temperature overnight. The mixture was concentrated, re-dissolved in DMSO, filtered and purified via  $\text{C}_{18}$  reverse phase HPLC to give 40.0 mg (54%) of the title compound as a white solid.

LC-MS Retention Time:  $t_1$  (Method 1) = 6.734 min.

$^1\text{H}$  NMR (400 MHz,  $\text{DMSO-}d_6$ )  $\delta$  ppm 11.57 (s, 1 H), 10.86 (s, 1 H), 8.59 (d,  $J=8.2$  Hz, 1 H), 8.35 (t,  $J=2.2$  Hz, 1 H), 8.04 (dd,  $J=7.8, 2.0$  Hz, 1 H), 8.01 (d,  $J=9.0$  Hz, 1 H), 7.81 (dd,  $J=7.8, 1.6$  Hz, 1 H), 7.53 - 7.67 (m, 3 H), 7.49 (d,  $J=7.8$  Hz, 1 H), 7.28 (td,  $J=7.6, 1.2$  Hz, 1 H), 7.22 (d,  $J=8.2$  Hz, 1 H), 7.07 - 7.15 (m, 1 H), 3.99 (s, 3 H).

$^{13}\text{C}$  NMR (101 MHz,  $\text{DMSO-}d_6$ )  $\delta$  ppm 167.33, 163.00, 157.15, 139.67, 137.64, 133.67, 131.78, 131.50, 129.97, 129.40 (q,  $J = 32.3$  Hz), 128.55, 125.46, 124.41, 123.70, 123.11, 122.20 (q,  $J = 242$  Hz), 121.97, 120.84, 120.28 (q,  $J = 4.0$  Hz), 116.25 (q,  $J = 4.0$  Hz), 112.25, 55.58.

$^{19}\text{F}$  NMR (376 MHz, DMSO- $d_6$ )  $\delta$  ppm -61.41 (s, 3 F).

HRMS (ESI)  $m/z$  (M+H) $^+$  calcd. for  $\text{C}_{22}\text{H}_{18}\text{F}_3\text{N}_2\text{O}_3$ , 415.1264; found 415.1266.

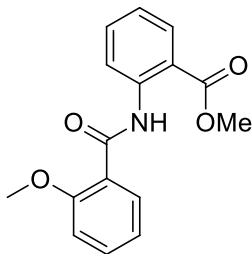

**Methyl 2-(2-methoxybenzamido)benzoate.** A solution of 2-aminobenzoate (2.57 mL, 19.9 mmol) in dichloromethane (50.0 mL) and TEA (8.30 mL, 59.5 mmol) was treated at 0 °C with 2-methoxybenzoyl chloride (2.67 mL, 19.9 mmol). The reaction mixture was stirred at 0 °C for 2 h and at room temperature for 2 h. The reaction mixture was concentrated and purified via silica gel chromatography using a gradient of 0-50% of EtOAc in hexanes to give 5.50 g (97%) of the title compound as a white solid.

LC-MS Retention Time:  $t_2$  (Method 2) = 3.761 min;  $m/z$  (M+H) $^+$  286.0.

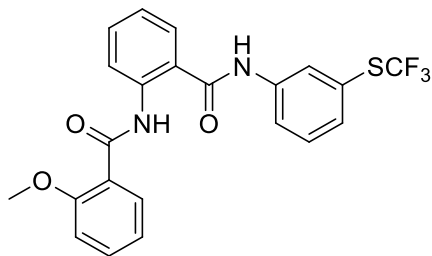

**2-Methoxy-N-(2-((3-(trifluoromethylthio)phenyl)carbamoyl)phenyl)benzamide (5).** A solution of methyl 2-(2-methoxybenzamido)benzoate (200 mg, 0.701 mmol) in toluene (1.50 mL) was treated at room temperature with 3-(trifluoromethylthio)aniline (271 mg, 1.40 mmol) followed by trimethylaluminum (0.700 mL, 2.0 M in hexanes, 1.40 mmol). The reaction mixture was stirred at 100 °C overnight. After cooling, the reaction mixture was quenched with 100  $\mu\text{L}$  of water and concentrated *in vacuo*. The crude residue was purified via silica gel chromatography using a gradient of 0-60% of EtOAc in hexanes to give 188 mg (60%) of the title compound as a white solid.

LC-MS Retention Time:  $t_1$  (Method 1) = 7.128 min.

$^1\text{H}$  NMR (400 MHz,  $\text{DMSO-}d_6$ )  $\delta$  ppm 11.55 (s, 1 H), 10.81 (s, 1 H), 8.58 (d,  $J=8.2$  Hz, 1 H), 8.33 (t,  $J=2.2$  Hz, 1 H), 8.03 (dd,  $J=7.8, 2.0$  Hz, 1 H), 7.93 (ddd,  $J=8.2, 2.3, 1.2$  Hz, 1 H), 7.80 (dd,  $J=7.8, 1.6$  Hz, 1 H), 7.52 - 7.63 (m, 3 H), 7.42 - 7.51 (m, 1 H), 7.27 (td,  $J=7.6, 1.2$  Hz, 1 H), 7.17 - 7.24 (m, 1 H), 7.06 - 7.16 (m, 1 H), 3.98 (s, 3 H).

$^{13}\text{C}$  NMR (101 MHz,  $\text{DMSO-}d_6$ )  $\delta$  ppm 167.23, 162.98, 157.15, 140.08, 137.59, 133.68, 131.75, 131.50, 131.32, 130.33, 129.67 (q,  $J = 310$  Hz), 128.60, 126.96, 124.47, 123.25 (q,  $J = 2.36$  Hz), 123.11, 122.80, 121.95, 121.27, 120.85, 112.25, 55.61.

$^{19}\text{F}$  NMR (376 MHz,  $\text{DMSO-}d_6$ )  $\delta$  ppm -41.92 (s, 3 F).

HRMS (ESI)  $m/z$  ( $\text{M}+\text{H}$ ) $^+$  calcd. for  $\text{C}_{22}\text{H}_{18}\text{F}_3\text{N}_2\text{O}_3\text{S}$ , 447.0985; found 447.0984.

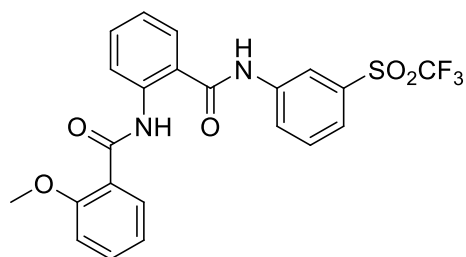

**2-Methoxy-*N*-(2-((3-((trifluoromethyl)sulfonyl)phenyl)carbamoyl)phenyl)benzamide (6).** A solution of 2-methoxy-*N*-(2-(3-(trifluoromethylthio)phenylcarbamoyl)phenyl)benzamide (100 mg, 0.224 mmol) in dichloromethane (3.00 mL) was treated at room temperature with MCPBA (193 mg, 1.12 mmol). The reaction mixture was stirred at room temperature overnight and quenched with saturated  $\text{Na}_2\text{S}_2\text{O}_3$  solution. The organic layer was separated, dried and concentrated. The crude residue was re-dissolved in DMSO, filtered and purified via  $\text{C}_{18}$  reverse phase HPLC to give 70.0 mg (65%) of the title compound as a white solid.

LC-MS Retention Time:  $t_1$  (Method 1) = 6.810 min.

$^1\text{H}$  NMR (400 MHz,  $\text{DMSO-}d_6$ )  $\delta$  ppm 11.59 (s, 1 H), 11.11 (s, 1 H), 8.81 - 8.87 (m, 1 H), 8.59 (dd,  $J=8.6, 0.8$  Hz, 1 H), 8.25 (dt,  $J=7.1, 2.3$  Hz, 1 H), 8.04 (dd,  $J=7.8, 2.0$  Hz, 1 H), 7.81 - 7.93 (m, 3 H), 7.52 - 7.67 (m, 2 H), 7.29 (td,  $J=7.6, 1.2$  Hz, 1 H), 7.23 (dd,  $J=8.6, 0.8$  Hz, 1 H), 7.11 (td,  $J=7.5, 1.0$  Hz, 1 H), 4.01 (s, 3 H).

$^{13}\text{C}$  NMR (101 MHz,  $\text{DMSO-}d_6$ )  $\delta$  ppm 167.60, 163.03, 157.18, 140.77, 137.78, 133.73, 132.08, 131.53, 131.39, 129.94 (q,  $J = 1.0$  Hz), 128.72, 128.45, 125.61, 123.93, 123.13, 122.08, 121.22, 120.86, 120.78, 119.43 (q,  $J = 328$  Hz), 112.27, 55.61.



$^{19}\text{F}$  NMR (376 MHz,  $\text{DMSO-}d_6$ )  $\delta$  ppm -78.39 (s, 3 F).

HRMS (ESI)  $m/z$  ( $\text{M}+\text{H}$ ) $^+$  calcd. for  $\text{C}_{22}\text{H}_{18}\text{F}_3\text{N}_2\text{O}_5\text{S}$ , 479.0883; found 479.0886.

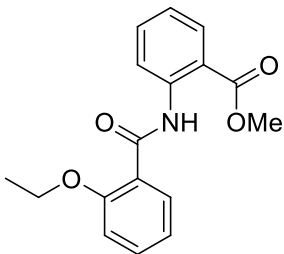

**Methyl 2-(2-ethoxybenzamido)benzoate.** A solution of ethyl methyl 2-aminobenzoate (1.29 mL, 9.92 mmol) in dichloromethane (25.0 mL) and triethylamine (4.15 mL, 29.8 mmol) was treated at 0 °C with 2-ethoxybenzoyl chloride (1.83 g, 9.92 mmol). The reaction mixture was stirred at 0 °C for 2 h and at room temperature for 2 h. The reaction mixture was concentrated and purified via silica gel chromatography using a gradient of 0-50% of EtOAc in hexanes to give 2.70 g (91%) of the title product as a white solid which was used directly in the next reaction without further purification.

LC-MS Retention Time:  $t_2$  (Method 2) = 3.908 min;  $m/z$  ( $\text{M}+\text{H}$ ) $^+$  300.1.

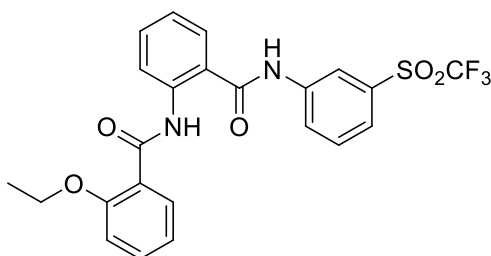

**2-Ethoxy-N-(2-((3-((trifluoromethyl)sulfonyl)phenyl)carbamoyl)phenyl)benzamide (7).** A solution of methyl 2-(2-ethoxybenzamido)benzoate (104 mg, 0.347 mmol) in toluene (1.50 mL) was treated at room temperature with 3-(trifluoromethylsulfonyl)aniline (117 mg, 0.521 mmol) followed by trimethylaluminum (0.521 mL, 2.0 M in hexanes, 1.04 mmol). The reaction mixture was stirred at 100 °C overnight. After cooling, the reaction mixture was quenched with 100  $\mu\text{L}$  of water and concentrated *in vacuo*. The crude residue was purified via silica gel chromatography using a gradient of 0-80% of EtOAc in hexanes to give 131 mg (77%) of the title compound as a white solid.

LC-MS Retention Time:  $t_1$  (Method 1) = 6.963 min.

$^1\text{H}$  NMR (400 MHz,  $\text{DMSO-}d_6$ )  $\delta$  ppm 11.35 (s, 1 H), 11.10 (s, 1 H), 8.76 (t,  $J=2.2$  Hz, 1 H), 8.53 (d,  $J=8.2$  Hz, 1 H), 8.23 (dt,  $J=7.1, 2.3$  Hz, 1 H), 7.96 (dd,  $J=7.8, 2.0$  Hz, 1 H), 7.80 - 7.92 (m, 3 H), 7.57 - 7.65 (m, 1 H), 7.53 (ddd,  $J=8.6, 7.0, 2.0$  Hz, 1 H), 7.30 (td,  $J=7.6, 1.2$  Hz, 1 H), 7.22 (d,  $J=8.2$  Hz, 1 H), 7.04 - 7.10 (m, 1 H), 4.31 (q,  $J=6.8$  Hz, 2 H), 1.31 (t,  $J=6.8$  Hz, 3 H).

$^{13}\text{C}$  NMR (101 MHz,  $\text{DMSO-}d_6$ )  $\delta$  ppm 167.44, 163.39, 156.00, 140.75, 137.73, 133.44, 132.10, 131.48, 131.34, 129.93, 128.81, 128.49, 125.58, 123.86, 123.21, 122.27, 122.08, 120.81, 120.67, 119.41 (q,  $J = 328$  Hz), 113.00, 64.09, 13.80.

$^{19}\text{F}$  NMR (376 MHz,  $\text{DMSO-}d_6$ )  $\delta$  ppm -78.40 (s, 3 F).

HRMS (ESI)  $m/z$  ( $\text{M}+\text{H}$ ) $^+$  calcd. for  $\text{C}_{23}\text{H}_{20}\text{F}_3\text{N}_2\text{O}_5\text{S}$ , 493.1040; found 493.1044.

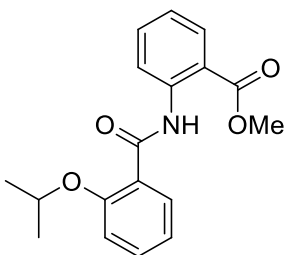

**Methyl 2-(2-isopropoxybenzamido)benzoate.** A solution of methyl 2-aminobenzoate (0.245 mL, 1.89 mmol) in dichloromethane (8.00 mL) and triethylamine (0.53 mL, 3.78 mmol) was treated at 0 °C with 2-isopropoxybenzoyl chloride (250 mg, 1.26 mmol). The reaction mixture was stirred at 0 °C for 2 hours and then at room temperature for another 2 hours. The reaction mixture was concentrated *in vacuo* and the crude residue was purified via silica gel chromatography using a gradient of 0-50% of EtOAc in hexanes to give 320 mg (81%) of the title compound as a colorless oil.

LC-MS Retention Time:  $t_1$  (Method 1) = 6.576 min;  $t_2$  (Method 2) = 3.825 min.

$^1\text{H}$  NMR (400 MHz,  $\text{DMSO-}d_6$ )  $\delta$  ppm 11.59 (s, 1 H), 8.63 (d,  $J=8.6$  Hz, 1 H), 7.98 (dd,  $J=7.8, 1.6$  Hz, 1 H), 7.83 (dd,  $J=7.8, 2.0$  Hz, 1 H), 7.64 (ddd,  $J=8.5, 7.1, 1.6$  Hz, 1 H), 7.45 - 7.56 (m, 1 H), 7.13 - 7.27 (m, 2 H), 6.94 - 7.09 (m, 1 H), 4.82 (dq,  $J=6.3, 6.0$  Hz, 1 H), 3.85 (s, 3 H), 1.35 (d,  $J=5.9$  Hz, 6 H).

HRMS (ESI)  $m/z$  ( $\text{M}+\text{H}$ ) $^+$  calcd. for  $\text{C}_{18}\text{H}_{20}\text{NO}_4$ , 314.1387; found 314.1399.

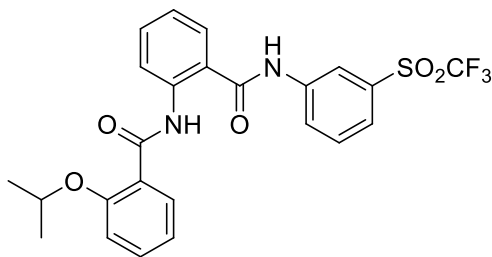

**2-Isopropoxy-N-(2-(3-(trifluoromethylsulfonyl)phenyl)carbamoyl)phenylbenzamide (8).** A solution of methyl 2-(2-isopropoxybenzamido)benzoate (110 mg, 0.351 mmol) in toluene (4.00 mL) was treated at room temperature with 3-(trifluoromethylsulfonyl)aniline (119 mg, 0.527 mmol) followed by trimethylaluminum (0.503 mL, 2.0 M in toluene, 1.06 mmol). The reaction mixture was stirred at 100 °C overnight. After cooling, the reaction mixture was quenched with 100  $\mu$ L of water and concentrated *in vacuo*. The crude residue was purified via silica gel chromatography using a gradient of 0-80% of EtOAc in hexanes to give 130 mg (73%) of the title compound as a white solid.

LC-MS Retention Time:  $t_1$  (Method 1) = 6.974 min;  $t_2$  (Method 2) = 3.881 min.

$^1\text{H}$  NMR (400 MHz,  $\text{DMSO-}d_6$ )  $\delta$  ppm 11.11 (s, 1 H), 11.09 (s, 1 H), 8.75 (s, 1 H), 8.48 (d,  $J=8.2$  Hz, 1 H), 8.20 (dt,  $J=7.4, 2.2$  Hz, 1 H), 7.91 (dd,  $J=7.8, 1.6$  Hz, 1 H), 7.77 - 7.89 (m, 3 H), 7.57 - 7.66 (m, 1 H), 7.51 (ddd,  $J=8.6, 7.0, 2.0$  Hz, 1 H), 7.30 (td,  $J=7.5, 1.0$  Hz, 1 H), 7.20 (d,  $J=8.6$  Hz, 1 H), 7.05 (t,  $J=7.4$  Hz, 1 H), 4.75 - 4.85 (m, 1 H), 1.32 (d,  $J=5.9$  Hz, 6 H).

$^{13}\text{C}$  NMR (101 MHz,  $\text{DMSO-}d_6$ )  $\delta$  ppm 167.24, 163.63, 155.29, 140.75, 137.61, 133.30, 132.06, 131.52, 131.28, 129.97 (br.), 128.89, 128.51, 125.58, 123.93, 123.29, 122.79, 122.56, 120.82, 120.44, 119.40 (q,  $J=328$  Hz), 113.98, 71.19, 21.05.

$^{19}\text{F}$  NMR (376 MHz,  $\text{DMSO-}d_6$ )  $\delta$  ppm -78.38 (s, 3 F).

HRMS (ESI)  $m/z$  ( $\text{M}+\text{H}$ ) $^+$  calcd. for  $\text{C}_{24}\text{H}_{22}\text{F}_3\text{N}_2\text{O}_5\text{S}$ , 507.1196; found 507.1221.

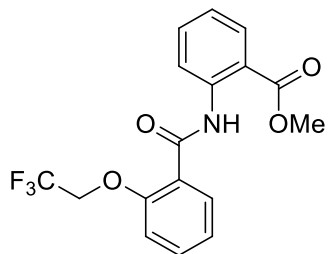

**Methyl 2-(2-(2,2,2-trifluoroethoxy)benzamido)benzoate.** A solution of 2-(2,2,2-trifluoroethoxy)benzoic acid (250 mg, 1.14 mmol) in dichloromethane (8.00 mL) and HATU (432 mg, 1.14 mmol) was treated at room temperature with methyl 2-aminobenzoate (0.147 mL, 1.14 mmol). The reaction was stirred at room temperature overnight. The mixture was concentrated *in vacuo* and purified via silica gel chromatography using a gradient of 0-80% of EtOAc in hexanes to give 281 mg (70%) of the title compound.

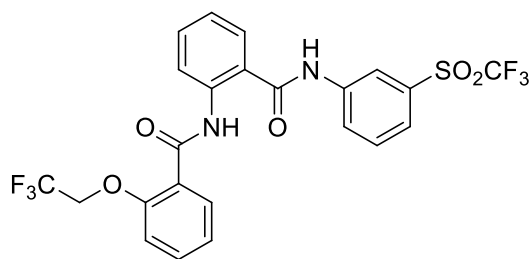

**2-(2,2,2-Trifluoroethoxy)-N-(2-((3-((trifluoromethyl)sulfonyl)phenyl)carbamoyl)phenyl)benzamide (9).**

A solution of methyl 2-(2-(2,2,2-trifluoroethoxy)benzamido)benzoate (150 mg, 0.425 mmol) in toluene (4.00 mL) was treated at room temperature with 3-(trifluoromethylsulfonyl)aniline (143 mg, 0.637 mmol) followed by trimethylaluminum (0.637 mL, 2.0 M in toluene, 1.06 mmol). The reaction mixture was stirred at 100 °C overnight. After cooling, the reaction mixture was quenched with 100  $\mu$ L of water and concentrated *in vacuo*. The crude residue was purified via silica gel chromatography using a gradient of 0-80% of EtOAc in hexanes to give 130 mg (73%) of the title compound as a white solid.

LC-MS Retention Time:  $t_1$  (Method 1) = 6.804 min.

$^1\text{H}$  NMR (400 MHz,  $\text{DMSO-}d_6$ )  $\delta$  ppm 11.10 (s, 1 H), 11.05 (s, 1 H), 8.64 (s, 1 H), 8.44 (d,  $J=8.2$  Hz, 1 H), 8.27 (dt,  $J=7.1, 2.3$  Hz, 1 H), 7.79 - 7.92 (m, 4 H), 7.60 - 7.69 (m, 1 H), 7.52 - 7.60 (m, 1 H), 7.37 (d,  $J=8.2$  Hz, 1 H), 7.31 (t,  $J=7.6$  Hz, 1 H), 7.19 (t,  $J=7.4$  Hz, 1 H), 4.94 (q,  $J=9.0$  Hz, 2 H).

$^{13}\text{C}$  NMR (101 MHz,  $\text{DMSO-}d_6$ )  $\delta$  ppm 167.46, 163.36, 154.24, 140.76, 137.68, 132.87, 132.27, 131.25, 130.85, 129.87, 128.99, 128.60, 125.45, 124.28, 123.83, 123.63 (q,  $J = 280$  Hz), 123.49, 122.52, 121.97, 121.05, 119.42 (q,  $J = 329$  Hz), 114.03, 65.00 (q,  $J = 35.0$  Hz).

$^{19}\text{F}$  NMR (376 MHz,  $\text{DMSO-}d_6$ )  $\delta$  ppm -72.46 (t,  $J=9.4$  Hz, 3 F), -78.48 (s, 3 F).

HRMS (ESI)  $m/z$  (M+H) $^+$  calcd. for  $\text{C}_{23}\text{H}_{17}\text{F}_6\text{N}_2\text{O}_5\text{S}$ , 547.0757; found 547.0762.

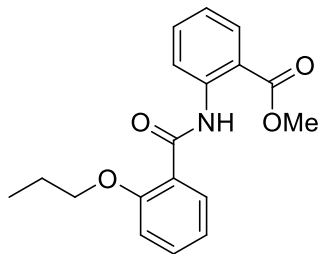

**Methyl 2-(2-propoxybenzamido)benzoate.** A solution of 2-propoxybenzoic acid (250 mg, 1.39 mmol) in dichloromethane (8.00 mL) and HATU (528 mg, 1.39 mmol) was treated at room temperature with methyl 2-aminobenzoate (0.180 mL, 1.39 mmol). The reaction was stirred at room temperature overnight. The mixture was concentrated *in vacuo* and purified via silica gel chromatography using a gradient of 0-100% of EtOAc in hexanes to give 400 mg (92%) of the title compound as a colorless oil.

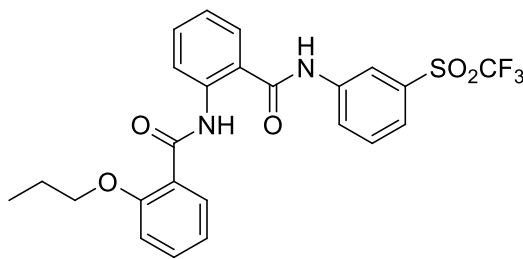

**2-Propoxy-N-(2-((3-((trifluoromethyl)sulfonyl)phenyl)carbamoyl)phenyl)benzamide (10).** A solution of methyl 2-(2-propoxybenzamido)benzoate (150 mg, 0.479 mmol) in toluene (3.00 mL) was treated at room temperature with 3-(trifluoromethylsulfonyl)aniline (162 mg, 0.718 mmol) followed by trimethylaluminum (0.718 mL, 2.0 M in toluene, 1.44 mmol). The reaction mixture was stirred at 110 °C overnight. After cooling, the reaction mixture was quenched with 100  $\mu$ L of water and concentrated *in vacuo*. The crude residue was purified via silica gel chromatography using a gradient of 0-80% of EtOAc in hexanes to give 84.0 mg (35%) of the title compound as a white solid.

LC-MS Retention Time:  $t_1$  (Method 1) = 7.147 min.

$^1\text{H}$  NMR (400 MHz, DMSO- $d_6$ )  $\delta$  ppm 11.26 (s, 1 H), 11.10 (s, 1 H), 8.72 (s, 1 H), 8.54 (d,  $J=8.6$  Hz, 1 H), 8.24 (dt,  $J=7.1, 2.3$  Hz, 1 H), 7.94 (dd,  $J=7.8, 2.0$  Hz, 1 H), 7.78 - 7.91 (m, 3 H), 7.56 - 7.67 (m, 1 H), 7.52 (ddd,  $J=8.5, 7.1, 2.0$  Hz, 1 H), 7.25 - 7.33 (m, 1 H), 7.20 (d,  $J=8.2$  Hz, 1 H), 7.07 (t,  $J=7.4$  Hz, 1 H), 4.16 (t,  $J=7.0$  Hz, 2 H), 1.71 (sxt,  $J=7.2$  Hz, 2 H), 0.77 (t,  $J=7.4$  Hz, 3 H).

$^{13}\text{C}$  NMR (101 MHz,  $\text{DMSO-}d_6$ )  $\delta$  ppm 167.42, 163.49, 156.14, 140.78, 137.75, 133.37, 132.14, 131.39, 131.33, 129.95 (br.), 128.90, 128.48, 125.54, 123.80, 123.21, 122.25, 122.15, 120.88, 120.68, 119.43 (q,  $J = 328$  Hz), 113.09, 69.82, 21.24, 9.74.

$^{19}\text{F}$  NMR (376 MHz,  $\text{DMSO-}d_6$ )  $\delta$  ppm -78.43 (s, 3 F).

HRMS (ESI)  $m/z$  ( $\text{M}+\text{H}$ ) $^+$  calcd. for  $\text{C}_{24}\text{H}_{22}\text{F}_3\text{N}_2\text{O}_5\text{S}$ , 507.1196; found 507.1219.

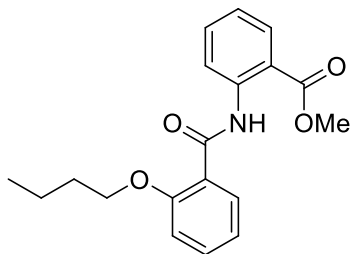

**Methyl 2-(2-butoxybenzamido)benzoate.** A solution of 2-butoxybenzoic acid (300 mg, 1.545 mmol) in dichloromethane (8.00 mL) and HATU (587 mg, 1.55 mmol) was treated at room temperature with methyl 2-aminobenzoate (0.300 mL, 2.32 mmol). The reaction was stirred at room temperature overnight. The mixture was concentrated *in vacuo* and purified via silica gel chromatography using a gradient of 0-100% of EtOAc in hexanes to give 400 mg (79%) of the title compound as a colorless oil.

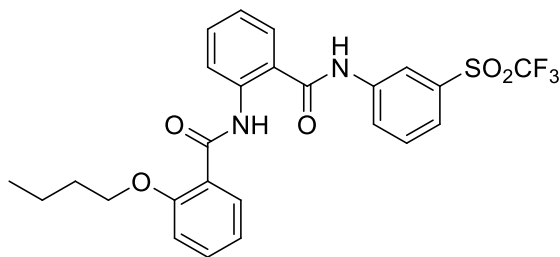

**2-Butoxy-N-(2-((3-(trifluoromethylsulfonyl)phenyl)carbamoyl)phenyl)benzamide (11).** A solution of methyl 2-(2-butoxybenzamido)benzoate (150 mg, 0.458 mmol) in toluene (3.00 mL) was treated at room temperature with 3-(trifluoromethylsulfonyl)aniline (155 mg, 0.687 mmol) followed by trimethylaluminum (0.688 mL, 2.0 M in toluene, 1.38 mmol). The reaction mixture was stirred at 110 °C overnight. After cooling, the reaction mixture was quenched with 100  $\mu\text{L}$  of water and concentrated *in vacuo*. The crude residue was purified via silica gel chromatography using a gradient of 0-80% of EtOAc in hexanes to give 72.0 mg (30%) of the title compound as a white solid.

LC-MS Retention Time:  $t_1$  (Method 1) = 7.325 min;  $t_2$  (Method 2) = 3.971 min.

$^1\text{H}$  NMR (400 MHz,  $\text{DMSO-}d_6$ )  $\delta$  ppm 11.27 (s, 1 H), 11.10 (s, 1 H), 8.71 (s, 1 H), 8.55 (d,  $J=8.2$  Hz, 1 H), 8.26 (dt,  $J=7.3, 2.0$  Hz, 1 H), 7.93 (dd,  $J=7.8, 2.0$  Hz, 1 H), 7.81 - 7.91 (m, 3 H), 7.58 - 7.68 (m, 1 H), 7.47 - 7.57 (m, 1 H), 7.29 (t,  $J=7.4$  Hz, 1 H), 7.22 (d,  $J=8.2$  Hz, 1 H), 7.08 (t,  $J=7.4$  Hz, 1 H), 4.19 (t,  $J=6.8$  Hz, 2 H), 1.57 - 1.73 (m, 2 H), 1.23 (sxt,  $J=7.5$  Hz, 2 H), 0.70 (t,  $J=7.4$  Hz, 3 H).

$^{13}\text{C}$  NMR (101 MHz,  $\text{DMSO-}d_6$ )  $\delta$  ppm 167.41, 163.52, 156.13, 140.81, 137.81, 133.37, 132.20, 131.36, 131.34, 129.96 (br.), 128.94, 128.41, 125.54, 123.59, 123.18, 122.30, 122.06, 120.85, 120.69, 113.09, 68.19, 29.93, 18.34, 13.37.

$^{19}\text{F}$  NMR (376 MHz,  $\text{DMSO-}d_6$ )  $\delta$  ppm -78.42 (s, 3 F).

HRMS (ESI)  $m/z$  ( $\text{M}+\text{H}$ ) $^+$  calcd. for  $\text{C}_{25}\text{H}_{24}\text{F}_3\text{N}_2\text{O}_5\text{S}$ , 521.1353; found 521.1359.

**Supplemental Figure S1 a-f. Concentration-response curves from selected assays for tested compounds.** **a.** cAMP assay in HEK-RXFP1 cells for relaxin, forskolin and compound **8**; **b.** cAMP assay in HEK-RXFP1 cells for compounds **1** and **3-11**; **c.** cAMP assay in THP1 cells; **d.** cAMP assay in HEK-RXFP2 cells; **e.** cAMP assay in HEK-V1b cells; and **f.** ATP cytotoxicity in HEK-RXFP1 cells. Compounds were run in triplicate, with 12-point titrations over the presented concentration range. Responses are plotted as the mean values  $\pm$  s.e.m for relative activity, normalized to positive control (100%) and vehicle control (0%), versus log molar concentration.

**a.**

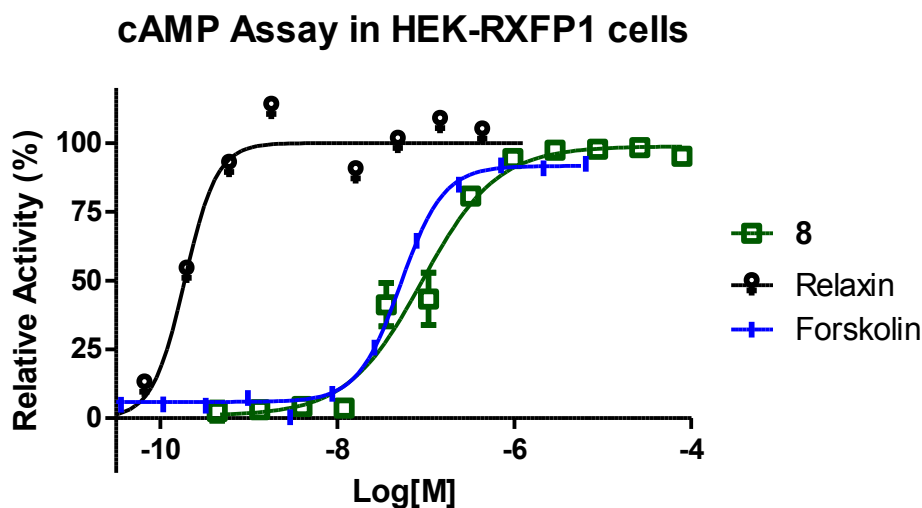

**b.**

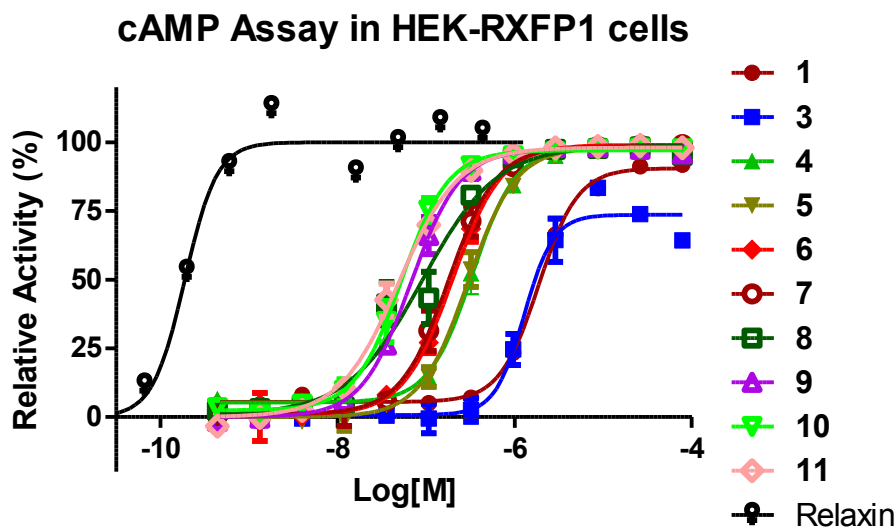



c.

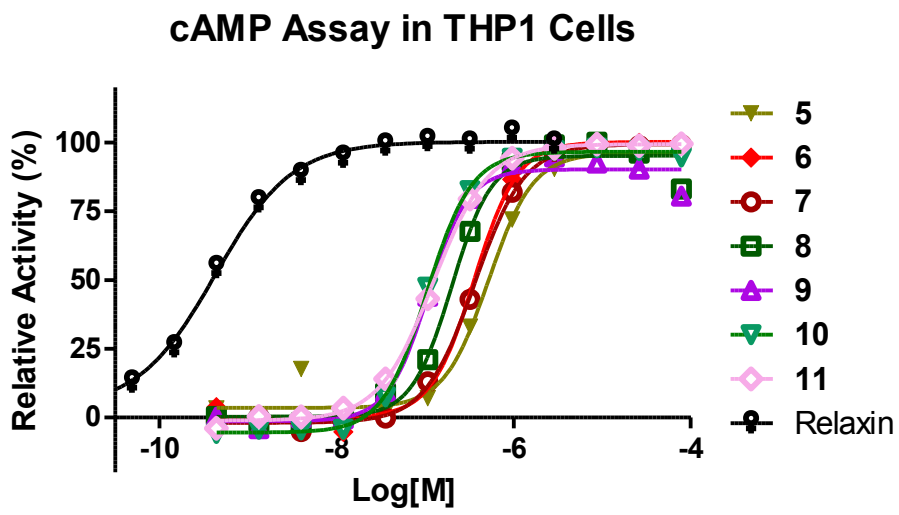

d.

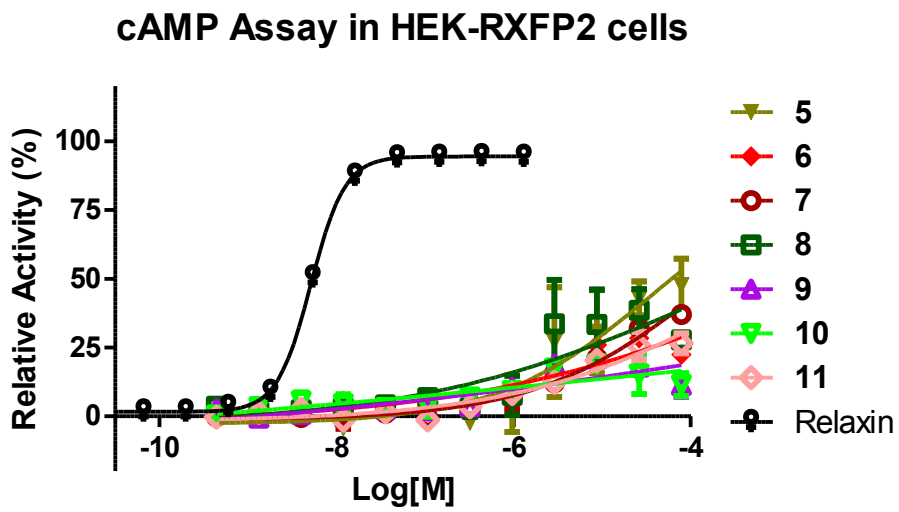

e.

### cAMP Assay in HEK-V1b cells

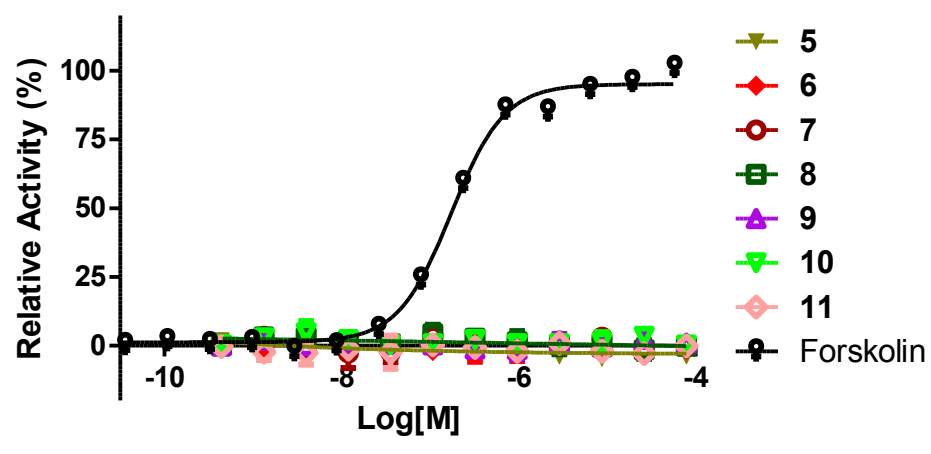

f.

### ATP Tox. 72 h in HEK-RXFP1 Cells

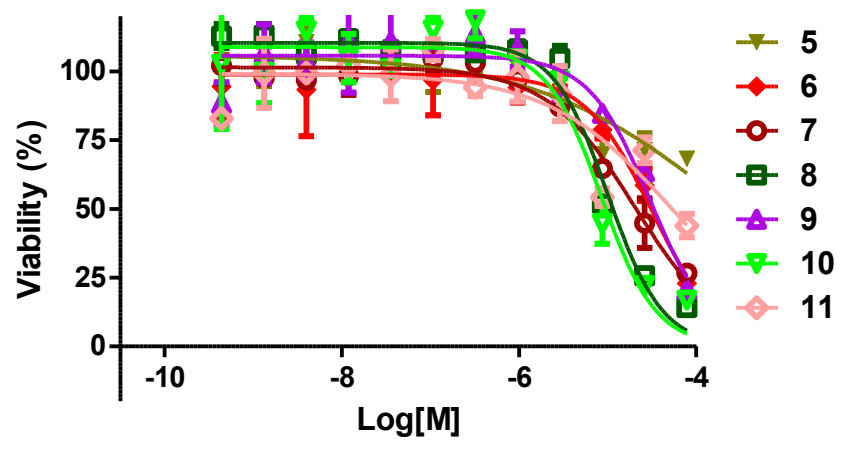

**Supplemental Table S1 a-e. Metabolic stability of compound in mouse liver microsomes (MLM) with and without NADPH.** The study was performed by Pharmaron via fee-for-service type of contract (www.pharmaron.com). Make a master solution containing microsomes (0.5 mg/mL), phosphate buffer (5 mM), ultra-pure H<sub>2</sub>O and MgCl<sub>2</sub> solution (5 mM) and then add 5 μL of 200 μM test compounds or control solution (verapamil). The final concentration of test compounds or verapamil in the reaction system was 2 μM. Pre-warm the mixture at 37°C for 5 min. The reaction was started with the addition of 50 μL of 10 mM NADPH solution at the final concentration of 1 mM and carried out at 37°C. 50 μL of ultra-pure H<sub>2</sub>O was used instead of NADPH solution in the negative control. Aliquots of 50 μL were taken from the reaction solution at 0, 15, 30, 45 and 60 min. The reaction was stopped by the addition of 4 volumes of cold methanol at the designated time points. Samples were centrifuged at 16,000 g for 10 minutes to precipitate protein. Aliquot of 100 μL of the supernatant was used for LC/MS/MS analysis. All experiments were performed in duplicate.

**a.**

| Incubation Time | Compound |      |
|-----------------|----------|------|
|                 | Without  | With |
| 0               |          |      |
| 15              |          |      |
| 30              |          |      |
| 45              |          |      |
| 60              |          |      |

**b.**

| Incubation Time | Compound |      |
|-----------------|----------|------|
|                 | Without  | With |
| 0               |          |      |
| 15              |          |      |
| 30              |          |      |
| 45              |          |      |
| 60              |          |      |

**c.**

| Incubation Time | Compound |         |
|-----------------|----------|---------|
|                 | With     | Without |
| 0               |          |         |
| 15              |          |         |
| 30              |          |         |
| 45              |          |         |
| 60              |          |         |

d.

| Incubation Time | Compound 10 |           |
|-----------------|-------------|-----------|
|                 | With N      | Without N |
| 0               | 100.0       | 100.0     |
| 15              | 92.3        | 98.29     |
| 30              | 82.8        | 98.29     |
| 45              | 76.7        | 97.14     |
| 60              | 74.4        | 93.71     |

e.

| Incubation Time | Compound |         |
|-----------------|----------|---------|
|                 | With     | Without |
| 0               |          |         |
| 15              |          |         |
| 30              |          |         |
| 45              |          |         |
| 60              |          |         |

**Supplemental Table S2. The stability results of compound 8 and control compound propantheline in human and mouse plasma.** The study was performed by Pharmaron via fee-for-service type of contract (www.pharmaron.com). The stock solution of test compound was prepared in DMSO at the concentration of 100  $\mu$ M and then human or mouse plasma was spiked to reach a final concentration of 1  $\mu$ M. The final percent volume of organic solvents was 1%. Add 500  $\mu$ L of spiked plasma sample into the centrifuge tube, and incubate at 37°C at approximately 60 rpm on an orbital shaker. Aliquots of 100  $\mu$ L were taken from the reaction solution at 0, 60 and 120 minutes. The reaction was stopped by the addition of 4 volumes of cold methanol at the designated time points. Samples were centrifuged at 20,000 g for 15 minutes to precipitate protein. An aliquot of 150  $\mu$ L of the supernatant was used for LC/MS/MS analysis. All experiments were performed in duplicate. The LC system comprised a Shimadzu liquid chromatograph separation system equipped with degasser DGU-20A3, solvent delivery unit LC-20AD, system controller CBM-20A, column oven CTO-10ASVP and CTC Analytics HTC PAL System. Mass spectrometric analysis was performed using an API 4000 instrument from AB Inc (Canada) with an ESI interface. The data acquisition and control system were created using Analyst 1.5 software from ABI Inc.

| Compou    | Incul<br>Time | Remaining percentage (%) |            |
|-----------|---------------|--------------------------|------------|
|           |               | in human p               | in mouse p |
| Propanthe | 0             | 100.0                    | 100.0      |
|           | 60            | 31.38                    | 26.31      |
|           | 120           | 6.22                     | 7.46       |
| <b>8</b>  | 0             | 100.0                    | 100.0      |
|           | 60            | 103.7                    | 100.3      |
|           | 120           | 104.9                    | 99.03      |

**Supplemental Figure S2. Three dimensional conformation of compound 8 in solution state.** Solution state of three dimensional conformation in DMSO-*d*<sub>6</sub> determined by NMR. Variable temperature NMRs were recorded in a temperature interval of 10 K from 298 K to 338 K at the concentration of 5 mM for compound 8 in DMSO-*d*<sub>6</sub>.

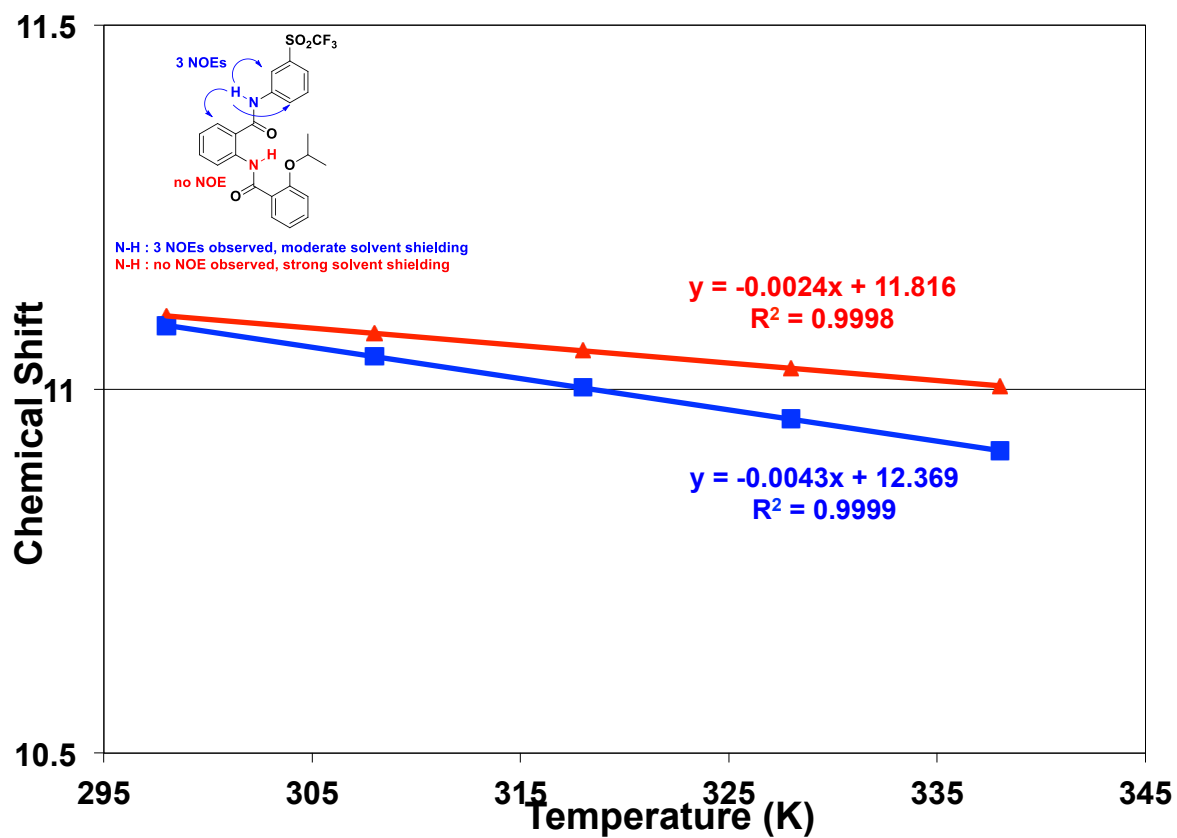



c. Bond lengths [Å] for compound 8.

| <b>F</b> | <b>Bond le</b> | <b>B</b> | <b>Bond le</b> | <b>B</b> | <b>Bond le</b> |
|----------|----------------|----------|----------------|----------|----------------|
| S(       | 1.42           | C(3)     | 0              | C(15)    | 1.3            |
| S(       | 1.42           | C(4)     | 1.4            | C(15)    | 0              |
| S(       | 1.75           | C(5)     | 1.4            | C(16)    | 0              |
| S(       | 1.84           | C(6)     | 1.3            | C(17)    | 0              |
| F(       | 1.3            | C(6)     | 1.4            | C(17)    | 0              |
| F(       | 1.3            | C(7)     | 1.3            | C(17)    | 0              |
| F(       | 1.3            | C(8)     | 1.5            | C(18)    | 1.3            |
| O(1      | 1.3            | C(9)     | 1.4            | C(18)    | 0              |
| O(1      | 1.46           | C(9)     | 1.4            | C(19)    | 1.3            |
| O(       | 1.2            | C(10)    | 1.3            | C(19)    | 0              |
| O(       | 1.2            | C(11)    | 1.5            | C(20)    | 1.3            |
| N(       | 1.3            | C(11)    | 1.5            | C(20)    | 0              |
| N(       | 1.4            | C(11)    |                | C(21)    | 0              |
| N(       | 0              | C(12)    | 0              | C(22)    | 1.3            |
| N(       | 1.3            | C(12)    | 0              | C(22)    | 0              |
| N(       | 1.4            | C(12)    | 0              | C(23)    | 1.3            |
| N(       | 0              | C(13)    | 1.3            | C(23)    | 0              |
| C(2      | 1.3            | C(13)    | 0              | C(24)    | 0              |
| C(       | 1.3            | C(14)    | 1.3            |          |                |
| C(       | 1.3            | C(14)    | 0              |          |                |

d. Bond angles [°] for compound 8.

| <b>Bon</b> | <b>Bonc</b> | <b>Bond</b> | <b>Bond</b> | <b>Bond</b>   | <b>Bond</b> |
|------------|-------------|-------------|-------------|---------------|-------------|
| O(3)-S(1   | 12          | C(7)-C(6)-  | 12          | C(16)-C(15)-  |             |
| O(3)-S(1   | 12          | C(18)-C(7)- | 11          | C(15)-C(16)-  | 120         |
| O(2)-S(1   | 12          | C(18)-C(7)- | 12          | C(15)-C(16)-  |             |
| O(3)-S(1   | 10          | C(6)-C(7)-  | 11          | C(10)-C(16)-  |             |
| O(2)-S(1   | 10          | O(5)-C(8)-  | 12          | C(11)-C(17)-l |             |
| C(2)-S(1   | 10          | O(5)-C(8)-  | 11          | C(11)-C(17)-l |             |
| C(10)-O(1  | 11          | N(2)-C(8)-  | 11          | H(17A)-C(17)- |             |
| C(5)-N(1   | 12          | C(13)-C(9)- | 11          | C(11)-C(17)-l |             |
| C(5)-N(1   |             | C(13)-C(9)- | 11          | H(17A)-C(17)- |             |
| C(4)-N(1   |             | C(10)-C(9)- | 12          | H(17B)-C(17)- |             |
| C(8)-N(2   | 12          | O(1)-C(10)- | 12          | C(19)-C(18)   | 120         |



|            |    |               |    |              |    |
|------------|----|---------------|----|--------------|----|
| C(8)-N(2)  |    | O(1)-C(10)    | 11 | C(19)-C(18)- |    |
| C(7)-N(2)  |    | C(16)-C(10)   | 11 | C(7)-C(18)-  |    |
| F(2)-C(1)  | 10 | O(1)-C(11)-   | 10 | C(20)-C(19)- | 12 |
| F(2)-C(1)  | 10 | O(1)-C(11)-   | 10 | C(20)-C(19)- |    |
| F(3)-C(1)  | 10 | C(12)-C(11)-  | 11 | C(18)-C(19)- |    |
| F(2)-C(1)  | 11 | O(1)-C(11)-   |    | C(21)-C(20)- | 11 |
| F(3)-C(1)  | 10 | C(12)-C(11)-  |    | C(21)-C(20)- |    |
| F(1)-C(1)  | 11 | C(17)-C(11)-  |    | C(19)-C(20)- |    |
| C(24)-C(3) | 12 | C(11)-C(12)-  |    | C(20)-C(21)- | 12 |
| C(24)-C(3) | 11 | C(11)-C(12)-  |    | C(20)-C(21)- |    |
| C(3)-C(2)  | 11 | H(12A)-C(12)- |    | C(6)-C(21)-  |    |
| C(4)-C(3)  | 11 | C(11)-C(12)-  |    | C(23)-C(22)- | 12 |
| C(4)-C(3)  |    | H(12A)-C(12)- |    | C(23)-C(22)- |    |
| C(2)-C(3)  |    | H(12B)-C(12)- |    | C(4)-C(22)-  |    |
| C(3)-C(4)  | 11 | C(14)-C(13)-  | 12 | C(22)-C(23)- | 12 |
| C(3)-C(4)  | 12 | C(14)-C(13)-  |    | C(22)-C(23)- |    |
| C(22)-C(3) | 11 | C(9)-C(13)-   |    | C(24)-C(23)- |    |
| O(4)-C(5)  | 12 | C(13)-C(14)-  | 11 | C(2)-C(24)-  | 11 |
| O(4)-C(5)  | 12 | C(13)-C(14)-  |    | C(2)-C(24)-  |    |
| N(1)-C(5)  | 11 | C(15)-C(14)-  |    | C(23)-C(24)- |    |
| C(21)-C(1) | 11 | C(14)-C(15)-  | 12 |              |    |
| C(21)-C(1) | 12 | C(14)-C(15)-  |    |              |    |

**e. Anisotropic displacement parameters ( $\text{\AA}^2 \times 10^3$ ) for compound 8.** The anisotropic displacement factor exponent takes the form:  $-2\pi^2 [h^2 a^{*2} U^{11} + \dots + 2 h k a^* b^* U^{12}]$ .

---

f. Hydrogen coordinates ( $\times 10^4$ ) and isotropic displacement parameters ( $\text{\AA}^2 \times 10^3$ ) for compound 8.

---

---

H  
H  
H

H  
H  
H

---

g. Hydrogen bonds for compound 8 [ $\text{\AA}$  and  $^\circ$ ].

| D-H..       | d(D-H) | d(D..) | d(H..) | <(D-H..) |
|-------------|--------|--------|--------|----------|
| N(1)-H(1).. | 0.09   | 2.91   | 3.00   | 175      |
| N(2)-H(2).. | 0.09   | 2.91   | 3.00   | 175      |
| N(2)-H(2).. | 0.09   | 2.91   | 3.00   | 175      |

**Supplemental Table S4 a-b. a.** Individual and mean plasma concentration-time data of compound **8** after an intraperitoneal (IP) dose of 30 mg/kg in male C57BL/6 mice. **b.** Individual and mean heart concentration-time data of compound **8** after an IP dose of 30 mg/kg in male C57BL/6 mice. (BQL = Below quantifiable limit of 1 ng/mL for compound **8** in male C57BL/6 tissues. NA = Not available. SD = Standard deviation in the mean (ng/mL) values across the three individuals. CV = Coefficient of variation for the individual sample values.)

**a.**

| Dose (mg/kg)              | Dose route | Sampling time (hr) | Concentration (ng/mL) |      |        | Mean (ng/mL) | Mean (μM) | SD   | CV(%) |
|---------------------------|------------|--------------------|-----------------------|------|--------|--------------|-----------|------|-------|
|                           |            |                    | Individual            |      |        |              |           |      |       |
| 30                        | IP         | 0                  | BQL                   | BQL  | BQL    | BQL          | BQL       | NA   | NA    |
|                           |            | 0.083              | 2650                  | 2660 | 2050   | 2453         | 4.8438    | 349  | 14.2  |
|                           |            | 0.25               | 2970                  | 2880 | 2890   | 2913         | 5.7520    | 49.3 | 1.69  |
|                           |            | 0.5                | 2860                  | 3810 | 3040   | 3237         | 6.3904    | 505  | 15.6  |
|                           |            | 1                  | 5030                  | 4890 | 4190   | 4703         | 9.2861    | 450  | 9.57  |
|                           |            | 2                  | 2660                  | 2580 | 3810   | 3017         | 5.9560    | 688  | 22.8  |
|                           |            | 4                  | 1630                  | 755  | 811    | 1065         | 2.1034    | 490  | 46.0  |
|                           |            | 8                  | 210                   | 321  | 225    | 252          | 0.4975    | 60.2 | 23.9  |
|                           |            | 12                 | 123                   | 74.6 | 132    | 110          | 0.2169    | 30.9 | 28.1  |
|                           |            | 24                 | 21.5                  | 17.9 | 52.5   | 30.6         | 0.0605    | 19.0 | 62.1  |
| 48                        | 0.914      | 2.90               | 13.0                  | 5.60 | 0.0111 | 6.48         | 116       |      |       |
| PK parameters             |            | Unit               | Estimate              |      |        |              |           |      |       |
| T <sub>max</sub>          |            | hr                 | 1.00                  |      |        |              |           |      |       |
| C <sub>max</sub>          |            | μM                 | 9.29                  |      |        |              |           |      |       |
| Terminal t <sub>1/2</sub> |            | hr                 | 8.56                  |      |        |              |           |      |       |
| AUC <sub>last</sub>       |            | hr*ng/mL           | 15882                 |      |        |              |           |      |       |
| AUC <sub>INF</sub>        |            | hr*ng/mL           | 15951                 |      |        |              |           |      |       |

b.

| Dose (gr/kg)                                | Dose route | Sampling time (hr) | Concentration (ng/g) |       |       | Mean (ng/g) | Mean (µmol/kg) | SD   | CV(%) |
|---------------------------------------------|------------|--------------------|----------------------|-------|-------|-------------|----------------|------|-------|
|                                             |            |                    | Individual           |       |       |             |                |      |       |
| 30                                          | IP         | 0                  | BQL                  | BQL   | BQL   | BQL         | BQL            | NA   | NA    |
|                                             |            | 0.083              | 9670                 | 9210  | 12500 | 10460       | 20.6519        | 1782 | 17.0  |
|                                             |            | 0.25               | 9920                 | 12600 | 14200 | 12240       | 24.1663        | 2163 | 17.7  |
|                                             |            | 0.5                | 13100                | 11700 | 10900 | 11900       | 23.4950        | 1114 | 9.36  |
|                                             |            | 1                  | 14000                | 14700 | 14800 | 14500       | 28.6284        | 436  | 3.01  |
|                                             |            | 2                  | 11400                | 9370  | 9560  | 10110       | 19.9609        | 1121 | 11.1  |
|                                             |            | 4                  | 5880                 | 3250  | 3840  | 4323        | 8.5359         | 1380 | 31.9  |
|                                             |            | 8                  | 1070                 | 1410  | 931   | 1137        | 2.2449         | 246  | 21.7  |
|                                             |            | 12                 | 631                  | 440   | 787   | 619         | 1.2228         | 174  | 28.1  |
|                                             |            | 24                 | 107                  | 73.9  | 332   | 171         | 0.3376         | 140  | 82.1  |
|                                             |            | 48                 | 4.58                 | 10.1  | 49.1  | 21.3        | 0.0420         | 24.3 | 114   |
| PK parameters                               |            | Unit               | Estimate             |       |       |             |                |      |       |
| T <sub>max</sub>                            |            | hr                 | 1.00                 |       |       |             |                |      |       |
| C <sub>max</sub>                            |            | µmol/kg            | 28.6                 |       |       |             |                |      |       |
| Terminal t <sub>1/2</sub>                   |            | hr                 | 7.48                 |       |       |             |                |      |       |
| AUC <sub>heart</sub> (AUC <sub>last</sub> ) |            | hr*ng/mL           | 60167                |       |       |             |                |      |       |
| AUC <sub>INF</sub>                          |            | hr*ng/mL           | 60397                |       |       |             |                |      |       |
| AUC <sub>heart</sub> /AUC <sub>plasma</sub> |            | %                  | 379                  |       |       |             |                |      |       |

**Supplemental Table S5 a-e. The determination of oral bioavailability of compound 8 in mice. a.** Individual and mean plasma concentration-time data of compound 8 after an oral gavage (PO) dose of 30 mg/kg in male C57BL/6 mice. **b.** Individual and mean heart concentration-time data of compound 8 after a PO dose of 30 mg/kg in male C57BL/6 mice. **c.** Individual and mean plasma concentration-time data of compound 8 after an intravenous (IV) dose of 3 mg/kg in male C57BL/6 mice. **d.** Individual and mean heart concentration-time data of compound 8 after an IV dose of 3 mg/kg in male C57BL/6 mice. (BLOQ = below limit of quantification of 1 ng/mL for compound 8 in male C57BL/6 tissues). **e.** Calculation of oral bioavailability (F%) of compound 8 in mice. BLOQ = Below quantifiable limit of 1 ng/mL for compound 8 in male C57BL/6 tissues. NA = Not available. SD = Standard deviation in the mean values across the three individuals.

**a.**

| Plasma concentration of compound 8 after 30 mg/kg oral administration |            |      |      |        |        |       |       |
|-----------------------------------------------------------------------|------------|------|------|--------|--------|-------|-------|
| Time<br>hr                                                            | Individual |      |      | Mean   | SD     | Mean  | SD    |
|                                                                       | ng/mL      |      |      | ng/mL  | ng/mL  | uM    | uM    |
| 0.17                                                                  | 292        | 116  | 126  | 178    | 98.85  | 0.351 | 0.195 |
| 0.5                                                                   | 318        | 374  | 227  | 306.33 | 74.19  | 0.605 | 0.146 |
| 1                                                                     | 327        | 224  | 265  | 272    | 51.86  | 0.537 | 0.102 |
| 1.5                                                                   | 247        | 185  | 160  | 197.33 | 44.79  | 0.39  | 0.088 |
| 2                                                                     | 385        | 103  | 184  | 224    | 145.19 | 0.442 | 0.287 |
| 3                                                                     | 90.3       | 149  | 122  | 120.43 | 29.38  | 0.238 | 0.058 |
| 5                                                                     | 28.3       | 26.2 | 91.7 | 48.73  | 37.23  | 0.096 | 0.073 |
| 7                                                                     | 6.87       | 7.54 | 18.8 | 11.07  | 6.7    | 0.022 | 0.013 |
| 24                                                                    | 2.13       | 2.64 | 3.1  | 2.62   | 0.49   | 0.005 | 0.001 |

**b.**

| Heart concentration of compound 8 after 30 mg/kg oral administration |            |      |      |         |        |         |         |
|----------------------------------------------------------------------|------------|------|------|---------|--------|---------|---------|
| Time<br>hr                                                           | Individual |      |      | Mean    | SD     | Mean    | SD      |
|                                                                      | ng/g       |      |      | ng/g    | ng/g   | umol/Kg | umol/Kg |
| 0.17                                                                 | 490        | 545  | 372  | 469     | 88.39  | 0.926   | 0.175   |
| 0.5                                                                  | 546        | 1270 | 354  | 723.33  | 483.06 | 1.428   | 0.954   |
| 1                                                                    | 541        | 716  | 325  | 527.33  | 195.86 | 1.041   | 0.387   |
| 1.5                                                                  | 749        | 1040 | 1290 | 1026.33 | 270.76 | 2.026   | 0.535   |
| 2                                                                    | 847        | 246  | 451  | 514.67  | 305.52 | 1.016   | 0.603   |
| 3                                                                    | 429        | 614  | 469  | 504     | 97.34  | 0.995   | 0.192   |
| 5                                                                    | 57.7       | 98.6 | 233  | 129.77  | 91.71  | 0.256   | 0.181   |
| 7                                                                    | 25.5       | 23.4 | 53.2 | 34.03   | 16.63  | 0.067   | 0.033   |
| 24                                                                   | BLOQ       | BLOQ | BLOQ | BLOQ    | BLOQ   | BLOQ    | BLOQ    |

c.

| Plasma concentration of compound <b>8</b> after 3 mg/kg IV administration |            |      |      |        |        |       |       |
|---------------------------------------------------------------------------|------------|------|------|--------|--------|-------|-------|
| Time                                                                      | Individual |      |      | Mean   | SD     | Mean  | SD    |
| hr                                                                        | ng/mL      |      |      | ng/mL  | ng/mL  | uM    | uM    |
| 0.08                                                                      | 467        | 273  | 401  | 380.33 | 98.64  | 0.751 | 0.195 |
| 0.25                                                                      | 337        | 174  | 151  | 220.67 | 101.4  | 0.436 | 0.2   |
| 0.5                                                                       | 216        | 104  | 14.8 | 111.6  | 100.82 | 0.22  | 0.199 |
| 1                                                                         | 171        | 115  | 8.87 | 98.29  | 82.35  | 0.194 | 0.163 |
| 2                                                                         | 149        | 83   | 11.6 | 81.2   | 68.72  | 0.16  | 0.136 |
| 3                                                                         | 17.1       | 85.9 | 61.7 | 54.9   | 34.9   | 0.108 | 0.069 |
| 5                                                                         | 11.6       | 16.2 | 42.6 | 23.47  | 16.73  | 0.046 | 0.033 |
| 7                                                                         | 37.8       | 11.3 | 16.1 | 21.73  | 14.12  | 0.043 | 0.028 |
| 24                                                                        | NS         | 6.12 | 2.75 | 4.44   | 2.38   | 0.009 | 0.005 |

d.

| Heart concentration of compound <b>8</b> after 3 mg/kg IV administration |            |      |      |         |         |         |         |
|--------------------------------------------------------------------------|------------|------|------|---------|---------|---------|---------|
| Time                                                                     | Individual |      |      | Mean    | SD      | Mean    | SD      |
| hr                                                                       | ng/g       |      |      | ng/g    | ng/g    | umol/Kg | umol/Kg |
| 0.08                                                                     | 2220       | 1060 | 2980 | 2086.67 | 966.92  | 4.12    | 1.909   |
| 0.25                                                                     | 1800       | 1000 | 367  | 1055.67 | 718.12  | 2.084   | 1.418   |
| 0.5                                                                      | 428        | 2590 | 22.2 | 1013.4  | 1380.37 | 2.001   | 2.725   |
| 1                                                                        | 1040       | 820  | 259  | 706.33  | 402.72  | 1.395   | 0.795   |
| 2                                                                        | 951        | 810  | 71.6 | 610.87  | 472.31  | 1.206   | 0.933   |
| 3                                                                        | 61.7       | 661  | 189  | 303.9   | 315.74  | 0.6     | 0.623   |
| 5                                                                        | 23.4       | 40.5 | 21.3 | 28.4    | 10.53   | 0.056   | 0.021   |
| 7                                                                        | 351        | 40.7 | 207  | 199.57  | 155.28  | 0.394   | 0.307   |
| 24                                                                       | 94.3       | 30.6 | 40.9 | 55.27   | 34.19   | 0.109   | 0.068   |

e.

| Parameter  | Units     | IV (n=1) | PO (n=1) | IV (n=5) | PO (n=2) |
|------------|-----------|----------|----------|----------|----------|
| AUClast    | hr*ng/mL  | 1        | 1        | 5        | 2        |
| AUCINF_obs | hr*ng/mL  | 1        | 1        | 5        | 2        |
| Cl_obs     | mL/min/kg | 6        | 6        | 8        | 8        |
| MRTlast    | hr        | 1        | 1        | 5        | 5        |
| Vss_obs    | L/kg      | 2        | 2        | 4        | 4        |
| t1/2       | hr        | 1        | 1        | 6        | 6        |
| C0         | ng/mL     | 4        | 4        | 2        | 2        |
| Tmax       | hr        | 1        | 1        | 1        | 1        |
| Cmax       | ng/mL     | 1        | 1        | 1        | 1        |
| F          | %         | 1        | 1        | 1        | 1        |

*a* This short half-life reflects a below limit of quantification (BLOQ) of compound **8** at 24 h time point in heart tissues for the given dose, which the model takes as zero concentration and very likely underestimates the elimination half-life of the compound in this tissue.

AUClast = the integral of the concentration-time curve using only the observed values. AUCINF\_obs = the integral of the concentration-time curve, predicting concentrations at additional timepoints using the elimination half-life. Cl\_obs = observed clearance. MRTlast = mean residence time based on the last observation. Vss\_obs = volume of distribution. t1/2 = elimination half-life. C0 = concentration immediately after dosing. Tmax = time of maximum concentration observed. Cmax = maximum concentration observed. F = oral bioavailability.

**Supplemental Figure S3 a-b. Activation of LDLa domain mutant D<sub>58</sub>E RXFP1 receptor with compound 8.** **a.** HEK293T cells transiently transfected with wild-type and mutant human RXFP1 receptor stimulated with relaxin at 90 ng/ml (150 nM). The mutant receptor did not respond to relaxin stimulation. Data were normalized as 100% cAMP response in cells transfected with wild-type receptor. **b.** Stimulation with compound 8 at 66nM induced the same cAMP response in cells transfected with the wild-type and D<sub>58</sub>E RXFP. Data were normalized as 100% cAMP response in cells transfected with wild-type RXFP1. Transfection efficiency and the surface expression of the wild-type and mutant receptor were similar (25). The bars represent the mean values  $\pm$  s.e.m.

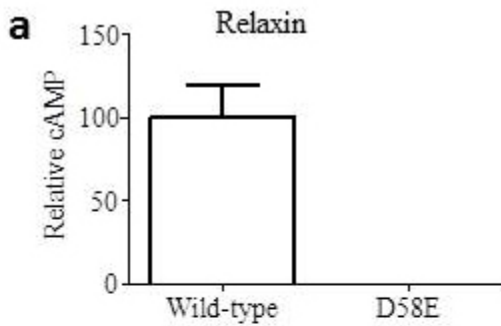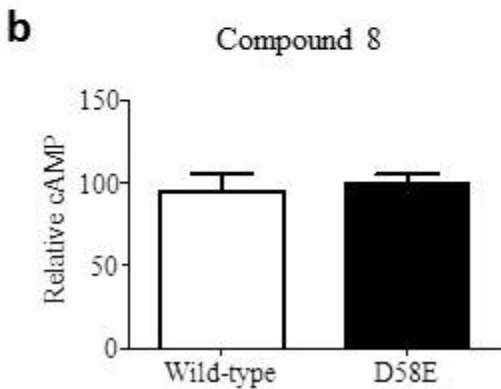



**Supplemental Table S6. Evaluation of the affinity of compound 8 for the agonist site of the human relaxin RXFP1 receptor in transfected HEK-293 cells determined in a radioligand binding assay.**

The assay was performed at Cerep with catalog ref. 2058 ([www.cerep.com](http://www.cerep.com)) via fee-for-service type of contract. Cell membrane homogenates (120 µg protein) are incubated for 60 min at 22°C with 0.02 nM [<sup>125</sup>I]relaxin 2 in the absence or presence of the test compound in a buffer containing 50 mM Tris-HCl (pH 7.4), 2 mM EDTA, 0.02% bacitracin and 0.5% BSA. Nonspecific binding is determined in the presence of 1 µM relaxin 2. Following incubation, the samples are filtered rapidly under vacuum through glass fiber filters (GF/B, Packard) presoaked with 0.5% PEI and rinsed several times with an ice-cold buffer containing 50 mM Tris-HCl and 500 mM NaCl using a 96-sample cell harvester (Unifilter, Packard). The filters are dried then counted for radioactivity in a scintillation counter (Topcount, Packard) using a scintillation cocktail (Microscint 0, Packard). The results are expressed as a percent inhibition of the control radioligand specific binding. The standard reference compound is relaxin 2, which is tested in each experiment at several concentrations to obtain a competition curve from which its IC<sub>50</sub> is calculated.

| Co | Conce | % Inh<br>Contro<br>Bi | %<br>Spe |  |  | Ref<br>Cor | IC <sub>50</sub> | Ki R |
|----|-------|-----------------------|----------|--|--|------------|------------------|------|
|    |       |                       |          |  |  |            |                  |      |
|    | 1     |                       |          |  |  | H2         |                  | 3.   |
|    | 5     |                       |          |  |  | H2         |                  | 3.   |
|    | 2     |                       |          |  |  | H2         |                  | 3.   |
|    | 1     |                       |          |  |  | H2         |                  | 3.   |
|    | 6     |                       |          |  |  | H2         |                  | 3.   |
|    | 3     |                       |          |  |  | H2         |                  | 3.   |

**Supplemental Table S7. Calculated chemical properties by ChemOffice12.**

| Compd    | Molecular Weight | cLogP<br>(partition coefficient) | Number of donors | Number of acceptors |
|----------|------------------|----------------------------------|------------------|---------------------|
|          | 390.39           | 5.0                              | 5                | 2                   |
|          | 429.41           | 3.1                              | 5                | 3                   |
|          | 384.31           | 5.0                              | 5                | 2                   |
|          | 414.31           | 5.1                              | 6                | 2                   |
|          | 446.41           | 5.4                              | 6                | 2                   |
|          | 478.41           | 4.9                              | 8                | 2                   |
|          | 492.41           | 5.4                              | 8                | 2                   |
|          | 506.41           | 5.7                              | 8                | 2                   |
|          | 546.41           | 5.7                              | 1                | 2                   |
| <b>1</b> | 506.41           | 5.9                              | 8                | 2                   |
| <b>1</b> | 520.51           | 6.3                              | 8                | 2                   |
